# Supplementary material
Source: PubMed Central journal article supplement (PMC7415599)
Supplement: NIHMS1604043-supplement-1.pdf [file NIHMS1604043-supplement-1.pdf]

## SUPPLEMENTAL FIGURE 1

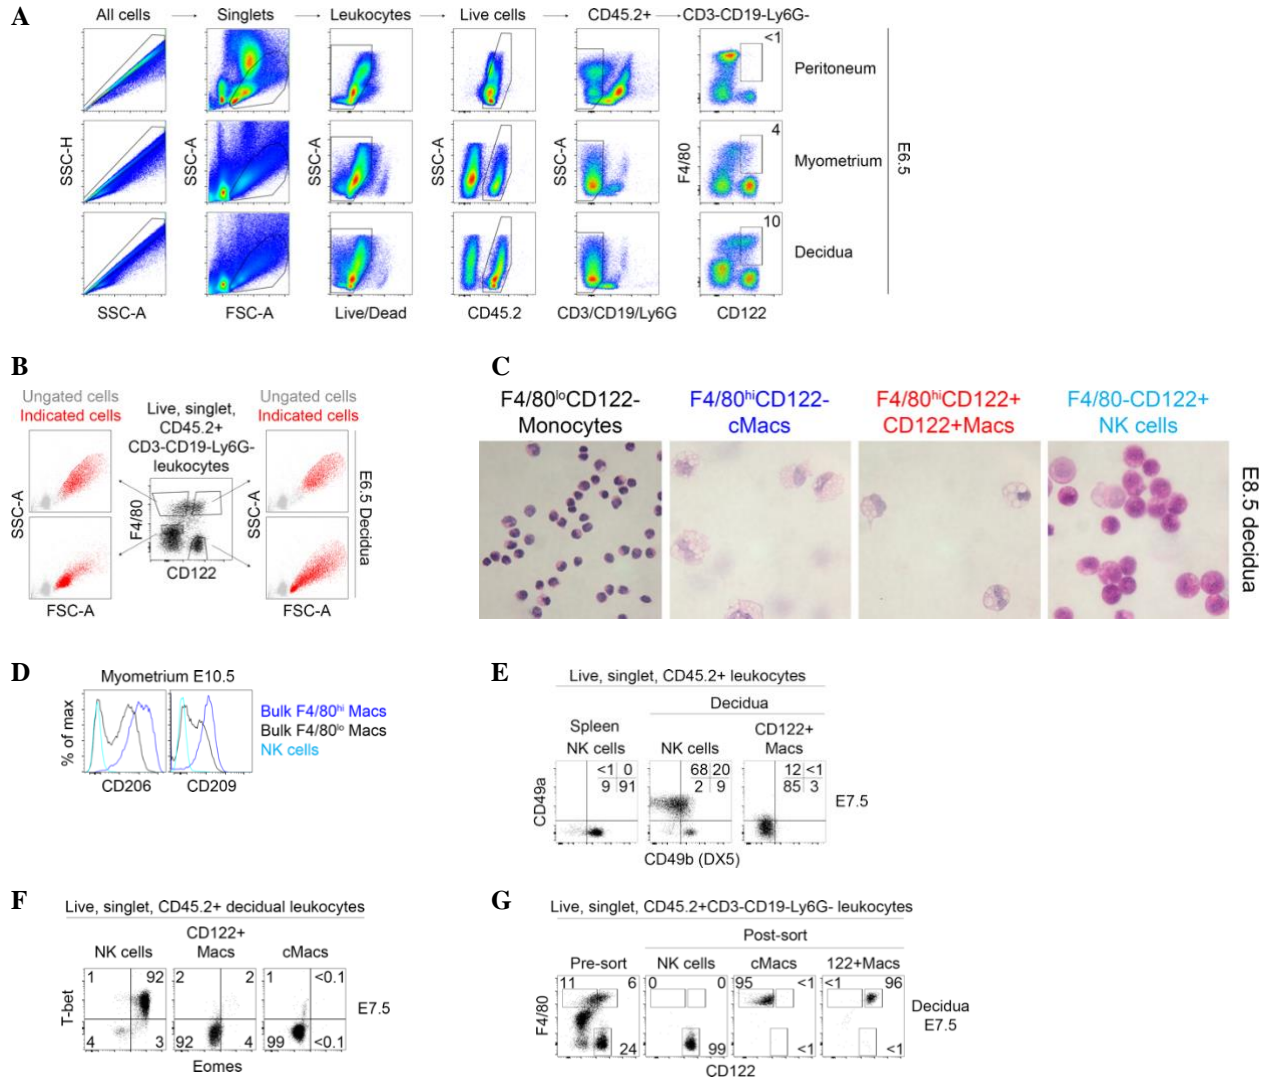

**Supplemental Figure 1. CD122+Macs are not NK cells, dendritic cells, or neutrophils.** (A) Shown is the raw gating scheme used to identify murine CD122+Macs. Data are representative of at least 20 independent experiments. (B) Like cMacs (F4/80<sup>hi</sup>CD122<sup>-</sup>), CD122+Macs (F4/80<sup>hi</sup>CD122<sup>+</sup>) are among the largest cells in the decidua at E6.5 by flow cytometric analysis. (C) From left, decidual CD122<sup>-</sup>F4/80<sup>lo</sup> cells at E8.5 are morphologically monocyte-like, all F4/80<sup>hi</sup> cells are vacuolated and macrophage-like, and CD122<sup>+</sup>F4/80<sup>-</sup> cells are more finely granular and NK-like. Indicated cells were FACS-sorted and stained with hematoxylin and eosin. Data are representative of 2 independent experiments. (D) All myometrial F4/80<sup>hi</sup>Macs, irrespective of CD122 status, express high levels of CD206 and CD209 (DC-SIGN) during gestation. We observed similar results in the decidua at E10.5, as well as similar results at other points throughout gestation. All events shown are live, singlet, CD3-CD19-Ly6G-CD45.2+ leukocytes, with NK cells F4/80-CD122<sup>+</sup>. Data are representative of at least 5 mice over 2 independent experiments. (E) Conventional splenic NK cells are CD49b/DX5<sup>+</sup>, decidual NK cells are largely CD49a<sup>+</sup>, and CD122+Macs express neither CD49a nor CD49b. Data are representative of 2-3 independent experiments with 2-3 mice per experiment. (F) Similarly, decidual NK cells express high levels of both T-bet and Eomes, while neither CD122+Macs nor cMacs express T-bet or Eomes. Data are representative of 2-3 independent experiments with 2-3 mice per experiment. (G) Shown is the sorting strategy to assess transcriptomes of purified decidual CD122+Macs, cMacs, and NK cells. Cells to be profiled by microarray were FACS-sorted to at least 95% purity from 3 independent groups of pooled E7.5 deciduae, with each group consisting of 4-5 mice.

**SUPPLEMENTAL TABLE 1**

| Gene symbol | Abs. FC | Adj. <i>p</i> val | Gene symbol   | Abs. FC | Adj. <i>p</i> val | Gene symbol   | Abs. FC | Adj. <i>p</i> val | Gene symbol   | Abs. FC | Adj. <i>p</i> val |
|-------------|---------|-------------------|---------------|---------|-------------------|---------------|---------|-------------------|---------------|---------|-------------------|
| C3ar1       | 302.56  | 8.29E-13          | Gm6377        | 62.86   | 2.12E-11          | Dsc2          | 0.1     | 1.25E-06          | Gimap4        | 0.05    | 1.99E-10          |
| Pf4         | 249.69  | 1.74E-12          | C5ar1         | 61.92   | 6.28E-11          | Satb1         | 0.1     | 3.46E-09          | Srgap3        | 0.05    | 1.75E-10          |
| C1qa        | 211.69  | 1.23E-10          | Alox5ap       | 61.47   | 8.27E-11          | Sidt1         | 0.1     | 2.37E-08          | Zdhhc15       | 0.05    | 5.24E-11          |
| C1qb        | 200.13  | 3.16E-10          | Clec4n        | 56.67   | 2.00E-10          | Pecam1        | 0.09    | 2.70E-09          | Gzmb          | 0.05    | 2.80E-09          |
| Ccl3        | 173.44  | 1.14E-10          | Lst1          | 56.29   | 2.33E-10          | Gpr141        | 0.09    | 4.61E-09          | Cst7          | 0.05    | 9.70E-10          |
| Ms4a7       | 171.44  | 1.62E-12          | Apoe          | 56.07   | 3.11E-11          | Gm40275       | 0.09    | 4.43E-09          | Itgal         | 0.04    | 1.30E-09          |
| C1qc        | 167.21  | 2.02E-12          | Aif1          | 55.55   | 4.21E-11          | Klrl1         | 0.09    | 8.97E-10          | Gzmc          | 0.04    | 6.56E-10          |
| Mrc1        | 159.25  | 3.09E-11          | Tlr8          | 50.64   | 1.40E-11          | Avil          | 0.09    | 9.29E-10          | E330009J07Rik | 0.04    | 1.60E-09          |
| Ly86        | 158.62  | 3.40E-12          | Wfdc17        | 50.59   | 9.21E-10          | Khdc1a        | 0.08    | 3.74E-10          | Sh2d1b2       | 0.04    | 8.38E-11          |
| Fcgr4       | 157.7   | 1.06E-11          | Ccl7          | 50.54   | 7.01E-11          | Cd3g          | 0.08    | 1.95E-09          | Ctsw          | 0.04    | 4.81E-11          |
| Pld4        | 151.62  | 1.13E-11          | Clec4a1       | 50.24   | 2.02E-11          | Pglyp1        | 0.08    | 6.18E-09          | Klrl2         | 0.04    | 3.11E-11          |
| Lyz2        | 147.95  | 1.51E-10          | Il1b          | 49.9    | 8.89E-11          | Ifitm1        | 0.08    | 2.07E-09          | Prfl          | 0.04    | 3.35E-09          |
| Cbr2        | 144.5   | 4.39E-12          | Cd74          | 49.5    | 5.81E-11          | Serpib9       | 0.08    | 1.71E-09          | Klrb1b        | 0.03    | 5.68E-11          |
| Ms4a6d      | 143.47  | 5.60E-12          | Cd300c2       | 47.99   | 2.34E-10          | I730030J21Rik | 0.08    | 1.37E-08          | Txk           | 0.03    | 1.00E-09          |
| Ccl8        | 141.11  | 1.27E-10          | Cd180         | 47.75   | 1.29E-10          | Myb           | 0.08    | 1.53E-09          | Car2          | 0.03    | 4.39E-11          |
| Tlr7        | 112.9   | 1.16E-11          | Cx3cr1        | 47.47   | 4.96E-10          | Gimap7        | 0.07    | 3.22E-09          | Eomes         | 0.03    | 6.07E-11          |
| Cybb        | 108.59  | 3.11E-11          | Csflr         | 47.44   | 5.43E-10          | Sult2b1       | 0.07    | 1.91E-08          | Syt12         | 0.03    | 1.65E-10          |
| Ctsh        | 104.16  | 3.40E-12          | Plbd1         | 46.96   | 1.13E-11          | Tbx21         | 0.07    | 6.56E-10          | Klrb1c        | 0.03    | 5.16E-10          |
| Ifi2712a    | 102.68  | 1.06E-11          | Cd86          | 46.65   | 1.16E-11          | Scin          | 0.07    | 2.03E-07          | Klra5         | 0.03    | 1.50E-10          |
| Ms4a6c      | 101.6   | 5.40E-12          | Ms4a4c        | 46.59   | 4.47E-11          | Klra21        | 0.07    | 2.59E-09          | Gzma          | 0.03    | 1.51E-10          |
| Sirpa       | 100.59  | 1.01E-10          | Tlr2          | 46.54   | 2.48E-11          | Syt13         | 0.07    | 7.50E-10          | Cd7           | 0.03    | 1.59E-10          |
| Fcrls       | 100.1   | 3.40E-12          | Fcgr2b        | 46.51   | 9.70E-10          | Atp1b1        | 0.06    | 4.13E-06          | Sh2d1a        | 0.03    | 8.89E-11          |
| Ms4a14      | 100.03  | 5.40E-12          | Ms4a4a        | 45.83   | 5.24E-09          | Sla2          | 0.06    | 5.89E-07          | Sh2d2a        | 0.03    | 5.97E-09          |
| Ccl2        | 99.48   | 2.02E-12          | Il18          | 45.27   | 3.15E-11          | Samd3         | 0.06    | 8.21E-11          | Thy1          | 0.02    | 7.62E-11          |
| Mpeg1       | 98.61   | 1.25E-10          | Ifit2         | 45.07   | 7.01E-11          | Gzmd          | 0.06    | 1.37E-09          | Gpr87         | 0.02    | 2.48E-11          |
| Tlr1        | 94.76   | 4.31E-12          | Slc15a3       | 44.62   | 1.28E-09          | P2ry10        | 0.06    | 3.21E-08          | Tnfrsf9       | 0.02    | 2.02E-11          |
| Ifi207      | 91.95   | 4.12E-10          | Cd33          | 44.02   | 3.26E-11          | Ctsf          | 0.06    | 1.75E-09          | Cd96          | 0.02    | 6.60E-12          |
| Lgmn        | 86.64   | 1.33E-09          | Apobec1       | 44      | 4.47E-11          | Ptprcap       | 0.06    | 4.13E-09          | Tmsb15a       | 0.02    | 1.40E-11          |
| Fcgr1       | 86.31   | 3.40E-12          | Ifngr2        | 43.35   | 2.40E-10          | Zbtb32        | 0.06    | 1.97E-07          | Mcpt8         | 0.02    | 1.37E-11          |
| Ccl6        | 76.14   | 2.05E-11          | Ifit3         | 42.46   | 2.02E-11          | Ptpn3         | 0.06    | 1.85E-09          | Ctla4         | 0.02    | 1.45E-10          |
| Cxcl16      | 76.12   | 3.42E-11          | H2-Aa         | 41.96   | 9.72E-12          | Myo10         | 0.06    | 1.89E-09          | Il2rb         | 0.02    | 6.56E-09          |
| Cxcl2       | 74.25   | 5.60E-12          | Gpr137b-ps    | 41.9    | 6.67E-12          | Il2ra         | 0.05    | 1.48E-08          | Xcl1          | 0.02    | 3.09E-11          |
| Tlr13       | 73.81   | 5.60E-12          | Hpgds         | 41.69   | 1.16E-11          | Fasf          | 0.05    | 4.44E-11          | Klrg1         | 0.02    | 5.43E-10          |
| Blnk        | 72.14   | 5.60E-12          | Spi1          | 40.74   | 3.42E-11          | Gzng          | 0.05    | 9.41E-09          | Klre1         | 0.01    | 7.23E-12          |
| Adgre1      | 68.94   | 1.89E-11          | Egr2          | 37.33   | 1.45E-10          | Icos          | 0.05    | 6.69E-10          | Klrd1         | 0.01    | 5.13E-12          |
| Dab2        | 64.81   | 4.24E-11          | Oas2          | 36.75   | 6.52E-10          | Lax1          | 0.05    | 3.49E-10          | Nkg7          | 0.01    | 1.71E-11          |
| P2ry6       | 63.89   | 1.27E-10          | G530011O06Rik | 36.73   | 1.86E-10          | Clnk          | 0.05    | 3.53E-11          | Ncr1          | 0.01    | 4.39E-12          |
| P2rx4       | 63.22   | 1.13E-11          | Gimap6        | 0.1     | 6.07E-09          |               |         |                   |               |         |                   |

**Supplemental Table 1. Macrophage-associated transcripts are abundant in decidual CD122+Macs, while killer lymphocyte transcripts are abundant in decidual NK cells.** Changes in gene expression by microarray between sort-purified CD122+Macs and NK cells. Only the top 150 differentially expressed genes by fold change (75 enriched in CD122+Macs and 75 enriched in NK cells) with an adjusted *p* value <0.05 are shown. Absolute fold change of each individual gene refers to level in CD122+Macs relative to level in NK cells. Of note, *Il2rb* (encoding CD122) was highly enriched in NK cells despite modest to no difference in detection of surface CD122 by flow cytometry.

**SUPPLEMENTAL TABLE 2**

| Gene symbol | Abs. FC | Adj. <i>p</i> val | Gene symbol   | Abs. FC | Adj. <i>p</i> val | Gene symbol   | Abs. FC | Adj. <i>p</i> val | Gene symbol | Abs. FC | Adj. <i>p</i> val |
|-------------|---------|-------------------|---------------|---------|-------------------|---------------|---------|-------------------|-------------|---------|-------------------|
| Ccl8        | 4.16    | 5.75E-04          | Gdf15         | 2.12    | 2.41E-03          | Tgm2          | 1.74    | 1.55E-02          | Oas12       | 1.51    | 4.07E-02          |
| Oas3        | 3.9     | 7.57E-04          | Dhx58         | 2.12    | 6.95E-03          | Tmsb15a       | 1.73    | 7.68E-03          | Chst14      | 1.5     | 3.52E-02          |
| Cfb         | 3.47    | 1.04E-04          | Irgm1         | 2.09    | 1.81E-02          | Fgl2          | 1.73    | 5.67E-03          | Msmo1       | 1.5     | 3.40E-02          |
| Ifi205      | 3.35    | 3.69E-04          | Phf11d        | 2.07    | 9.42E-03          | H2-T24        | 1.72    | 2.66E-02          | H2-Ab1      | 0.5     | 2.92E-02          |
| Ifit2       | 3.22    | 3.06E-04          | Ifi209        | 2.06    | 3.72E-03          | Clen7         | 1.71    | 1.50E-02          | Timd4       | 0.5     | 5.03E-03          |
| Mmp27       | 3.05    | 5.55E-03          | Gm5431        | 2.05    | 3.51E-02          | Gpr157        | 1.7     | 2.29E-02          | Tmem119     | 0.48    | 1.82E-03          |
| Zbp1        | 2.92    | 1.04E-04          | Gzmg          | 2.04    | 3.42E-02          | Il18          | 1.69    | 2.04E-02          | Tdo2        | 0.48    | 2.41E-03          |
| Ifi7        | 2.9     | 2.77E-02          | Ifi206        | 2.04    | 3.29E-03          | Tent5c        | 1.69    | 2.94E-02          | Clec4b1     | 0.47    | 3.87E-02          |
| Gzmc        | 2.86    | 7.57E-04          | BC147527      | 2.02    | 6.34E-03          | Il1rn         | 1.69    | 5.55E-03          | Igfbp7      | 0.47    | 6.34E-03          |
| Oas1        | 2.85    | 4.94E-04          | Gm12250       | 2       | 1.73E-03          | Gzma          | 1.68    | 4.40E-02          | Tmem176a    | 0.47    | 2.41E-03          |
| Gzmb        | 2.84    | 2.28E-03          | Cbr2          | 1.98    | 3.20E-03          | P2rx4         | 1.68    | 1.59E-02          | Areg        | 0.47    | 2.55E-02          |
| Ifit3b      | 2.82    | 1.30E-04          | Gbp4          | 1.98    | 6.17E-03          | Gbp3          | 1.67    | 1.75E-02          | Cd74        | 0.46    | 3.67E-03          |
| Ifi44       | 2.73    | 9.05E-04          | Stat1         | 1.97    | 4.40E-02          | Ifih1         | 1.67    | 8.33E-03          | Plpp1       | 0.46    | 1.60E-02          |
| Fabp5       | 2.72    | 4.94E-04          | Gm1966        | 1.96    | 2.07E-02          | Slfm5         | 1.67    | 2.05E-02          | Fpr1        | 0.46    | 6.34E-03          |
| Fabp3       | 2.68    | 4.93E-04          | Phf11c        | 1.95    | 3.72E-03          | Fcgr4         | 1.67    | 4.25E-02          | Sparc1      | 0.45    | 6.59E-03          |
| Slfm1       | 2.67    | 3.17E-03          | Gbp9          | 1.95    | 2.41E-03          | Fcgr1         | 1.66    | 6.34E-03          | Slpi        | 0.45    | 3.94E-02          |
| Spp1        | 2.66    | 5.52E-04          | Slc9a7        | 1.95    | 7.76E-03          | Ldlr          | 1.65    | 3.41E-02          | Mfap5       | 0.45    | 2.41E-03          |
| Ifi208      | 2.59    | 2.65E-03          | Nkg7          | 1.92    | 7.07E-03          | Lap3          | 1.64    | 3.73E-02          | Efemp1      | 0.45    | 1.58E-02          |
| Gzmd        | 2.51    | 1.87E-03          | Clec10a       | 1.92    | 4.95E-02          | P2ry14        | 1.63    | 4.33E-02          | Tgfb2       | 0.44    | 6.59E-03          |
| Cd300lf     | 2.48    | 5.63E-04          | Trem12        | 1.9     | 5.67E-03          | Zfp954        | 1.61    | 4.45E-02          | Siglece     | 0.44    | 7.07E-03          |
| Phf11a      | 2.41    | 9.63E-03          | Ddx58         | 1.89    | 2.43E-02          | Scimp         | 1.61    | 3.42E-02          | Cd24a       | 0.42    | 2.05E-02          |
| Tnfrsf10    | 2.4     | 2.47E-03          | Ddx60         | 1.88    | 2.39E-02          | Csfl          | 1.6     | 9.21E-03          | Hpgd        | 0.41    | 6.34E-03          |
| Rsad2       | 2.39    | 3.72E-03          | Slfm2         | 1.88    | 2.87E-02          | Slfm3         | 1.59    | 4.83E-02          | H2-Eb1      | 0.4     | 3.57E-03          |
| Hpse        | 2.36    | 4.51E-04          | Msrb1         | 1.88    | 1.84E-02          | Trim30d       | 1.59    | 8.69E-03          | F5          | 0.4     | 9.12E-03          |
| Ifit3       | 2.33    | 5.75E-04          | Xdh           | 1.86    | 4.18E-02          | Slc38a6       | 1.57    | 3.32E-02          | Plxdc2      | 0.4     | 5.52E-04          |
| Atp6v0d2    | 2.29    | 2.41E-03          | Npl           | 1.86    | 1.14E-02          | Cs2rb         | 1.57    | 4.09E-02          | Retnla      | 0.38    | 7.82E-03          |
| Cmpk2       | 2.24    | 2.28E-03          | Lrp12         | 1.85    | 2.82E-03          | Lgals8        | 1.57    | 1.38E-02          | Vsig4       | 0.38    | 3.43E-04          |
| Ms4a4c      | 2.23    | 2.41E-03          | Ube216        | 1.85    | 1.13E-02          | Renbp         | 1.55    | 4.40E-02          | Selp        | 0.34    | 2.41E-03          |
| Ifit1       | 2.23    | 4.69E-03          | Gas2l3        | 1.81    | 3.85E-02          | Cd22          | 1.55    | 4.40E-02          | Fabp7       | 0.3     | 2.76E-03          |
| Isg20       | 2.22    | 1.02E-03          | Mx1           | 1.8     | 4.08E-03          | Slfm8         | 1.55    | 2.30E-02          | Fn1         | 0.27    | 5.52E-04          |
| Nt5c3       | 2.21    | 6.75E-04          | G530011O06Rik | 1.8     | 2.88E-02          | Il18bp        | 1.55    | 2.30E-02          | Adgre4      | 0.23    | 2.36E-04          |
| Gpnmh       | 2.17    | 2.64E-03          | Pap11         | 1.79    | 8.69E-03          | B430306N03Rik | 1.54    | 1.38E-02          | Scpinb10    | 0.23    | 1.78E-04          |
| Gbp8        | 2.16    | 3.83E-03          | Agtrap        | 1.79    | 2.60E-02          | Tmem144       | 1.54    | 2.87E-02          | Il6         | 0.18    | 3.25E-04          |
| Cd200r4     | 2.16    | 1.65E-02          | Papss2        | 1.78    | 1.43E-02          | F13a1         | 1.54    | 3.55E-02          | Scpinb2     | 0.1     | 1.04E-04          |
| Pde7b       | 2.15    | 4.08E-03          | Gbp5          | 1.78    | 5.44E-03          | Pikfb3        | 1.53    | 2.66E-02          | Alox15      | 0.08    | 6.53E-06          |
| Slfm4       | 2.14    | 3.79E-03          | Tmem140       | 1.77    | 1.00E-02          | Themis2       | 1.53    | 1.81E-02          | Cxcl13      | 0.08    | 1.30E-04          |
| Gbp7        | 2.14    | 4.18E-02          | Stat2         | 1.77    | 1.35E-02          | Dusp3         | 1.51    | 4.14E-02          | Saa3        | 0.05    | 4.55E-06          |
| Usp18       | 2.13    | 2.25E-03          | Dtx3l         | 1.77    | 4.14E-02          | Osbp18        | 1.51    | 2.66E-02          | Prg4        | 0.04    | 2.46E-05          |
| Siglec1     | 2.13    | 1.66E-02          | Nxpe5         | 1.76    | 1.95E-02          |               |         |                   |             |         |                   |

**Supplemental Table 2. Interferon-stimulated genes and cytolytic transcripts distinguish the transcriptome of decidual CD122+Macs from that of decidual cMacs.** Changes in gene expression by microarray between sort-purified CD122+Macs and cMacs. Only those with an adjusted *p* value <0.05, absolute fold change of >1.5, or <0.5 are shown. Absolute fold change of each individual gene refers to level in CD122+Macs relative to level in cMacs. Of note, *Il2rb* (encoding CD122) met threshold unadjusted *p* value but did not meet threshold adjusted *p* value.

**SUPPLEMENTAL FIGURE 2**

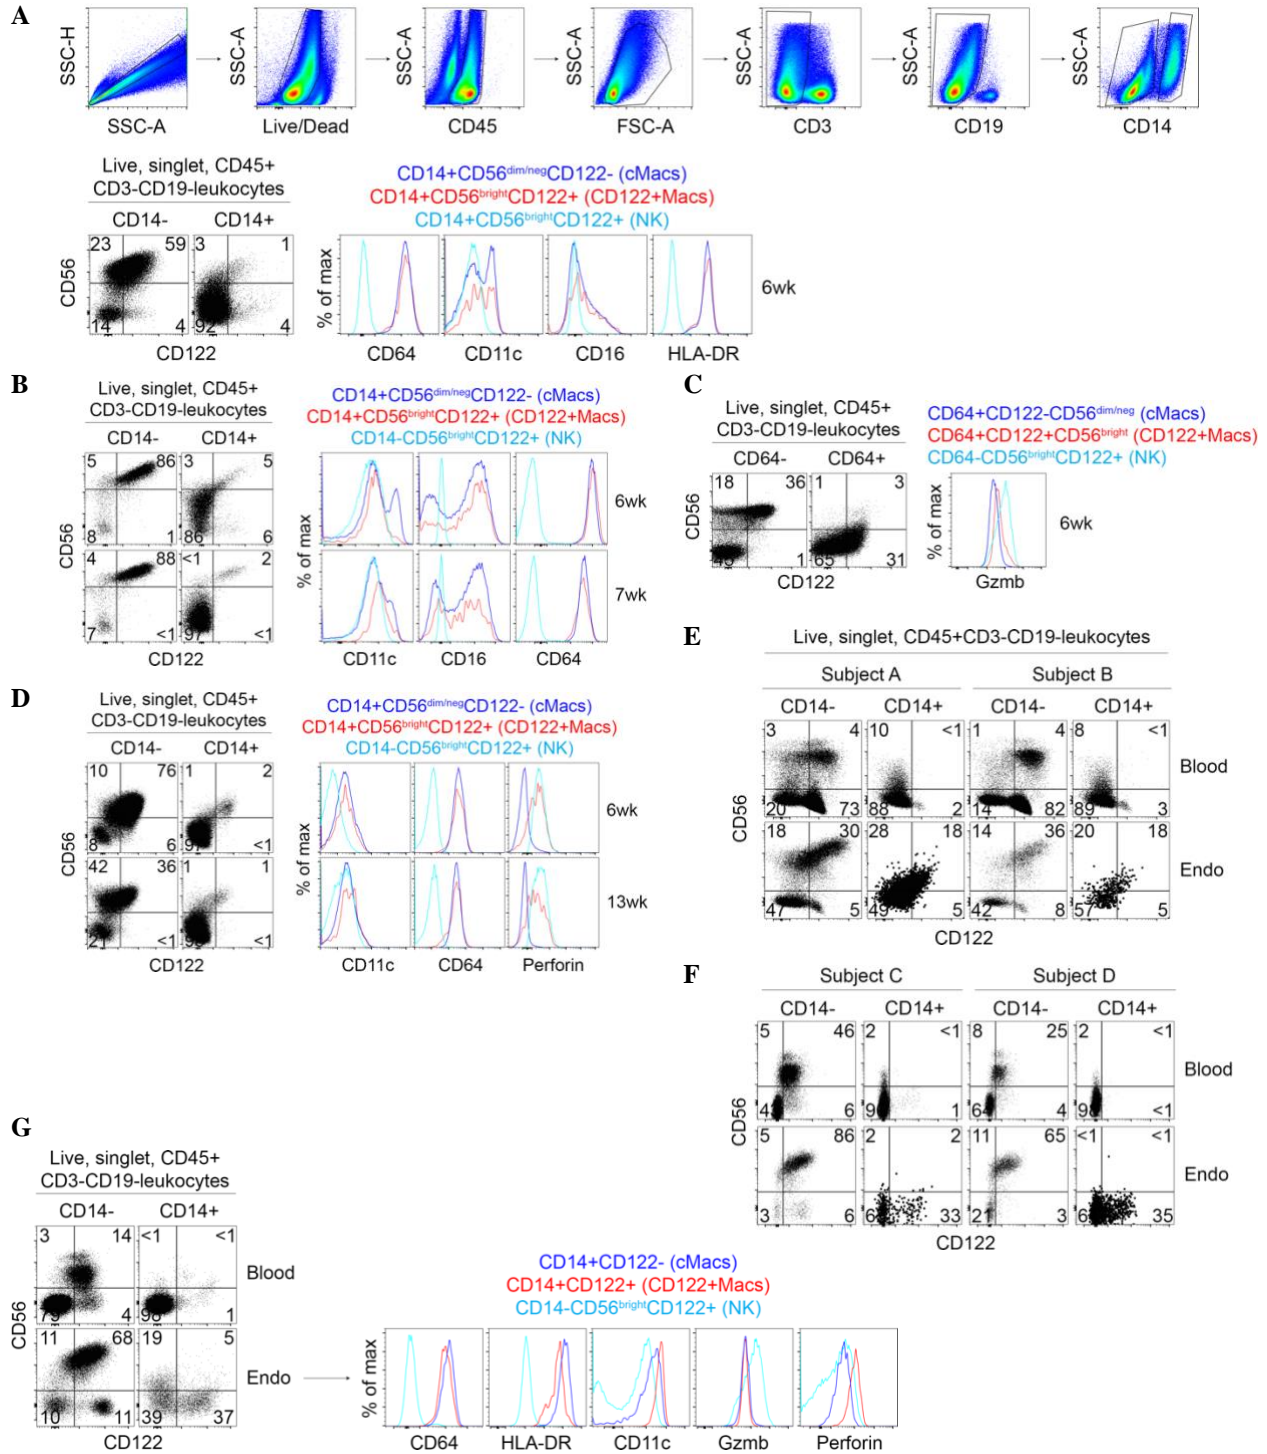

**Supplemental Figure 2. Human CD122+Macs are present in first trimester decidua and secretory phase endometrium during the implantation window.** (A-D) Additional examples of human CD122+Macs in first-trimester deciduae analyzed after elective terminations of pregnancy. Shown in (A) is the raw gating scheme to identify human CD122+Macs. (E-G) Additional examples of human CD122+Macs in secretory phase endometrium. Like first-trimester decidual CD122+Macs, endometrial CD122+Macs variably express CD56. Up to two samples were sometimes processed simultaneously. Any samples stained and analyzed on the same day are shown in the same sub-figure, with headings to distinguish each individual subject from one another.
